# Supplementary material
Source: publisher site journal article supplement (https://www.dovepress.com/article/433965)
Supplement: Supplementary file 1 [file get_supplementary_file.php]

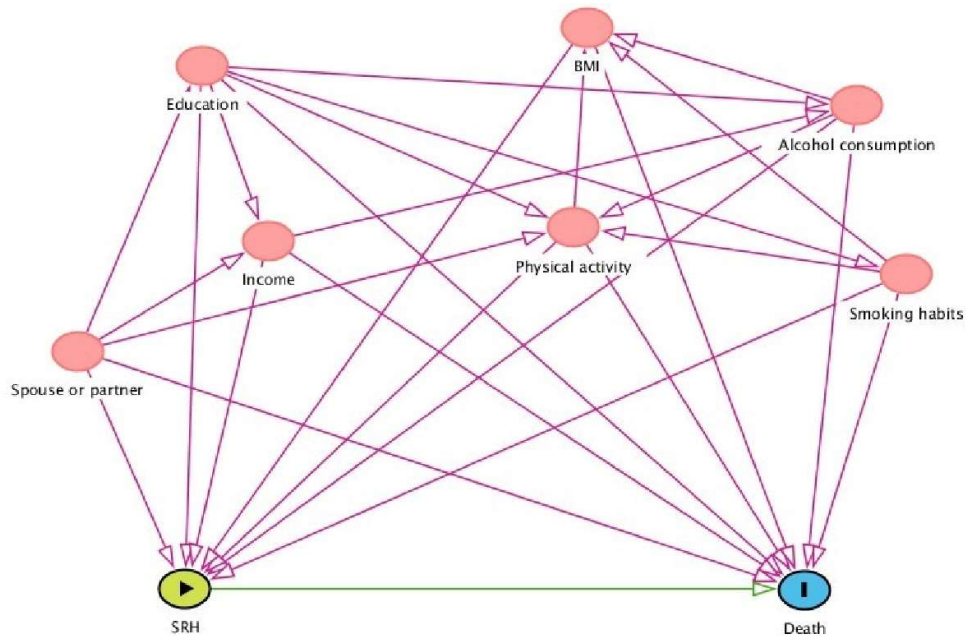

1  
 2 **Supplementary Figure 1** Directed acyclic graph showing the causal pathway from baseline  
 3 self-rated health (SRH) to death, including assumed confounders.

4  
 5

6 **Supplementary Table 1** Cancer diagnoses in the Norwegian Women and Cancer cohort, by  
 7 International Classification of Diseases Revision 10 (ICD-10) category.

| ICD-10 codes | Cancer sites                                | N    |
|--------------|---------------------------------------------|------|
| C00-C14      | Lip, oral cavity, and pharynx               | 190  |
| C15-C26      | Digestive organs                            | 2967 |
| C30-C39      | Respiratory and intrathoracic organs        | 1345 |
| C40-C41      | Bone and articular cartilage                | 13   |
| C43-C44      | Skin                                        | 1113 |
| C45-C49      | Mesothelial and soft tissue                 | 142  |
| C50          | Breast                                      | 5075 |
| C51-C58      | Female genital organs                       | 2104 |
| C64-C68      | Urinary tract                               | 463  |
| C69-C72      | Eye, brain, and other parts of CNS          | 343  |
| C73-C75      | Thyroid and other endocrine organs          | 249  |
| C76          | Other ill-defined sites                     | 107  |
| C81-C96      | Lymphoid, haemopoietic, and related tissue  | 1115 |
| D37-D48      | Neoplasms of uncertain or unknown behaviour | 193  |

8  
 9

10 **Supplementary Table 2** Associations between baseline self-rated health (SRH) and  
 11 mortality after cancer diagnosis in the Norwegian Women and Cancer cohort (N=15 412),  
 12 assessed with flexible parametric modelling using restricted cubic splines with 2 knots to  
 13 baseline SRH. We stratified by the cancer sites listed in supplementary table 1.

|                                        | Age-adjusted <sup>a</sup> |           | Multivariable <sup>b</sup> |           |
|----------------------------------------|---------------------------|-----------|----------------------------|-----------|
|                                        | HR                        | 95% CI    | HR                         | 95% CI    |
| <b>Good vs. very good SRH (N=9742)</b> | 1.03                      | 0.97-1.12 | 0.99                       | 0.91-1.07 |
| <b>Poor vs. very good SRH (N=1268)</b> | 1.25                      | 1.10-1.41 | 1.14                       | 1.00-1.30 |

14 a) Age adjustment was performed using age as the underlying timescale

15 b) In the multivariable models, we adjusted for age (timescale), physical activity level, body mass index, smoking habits, alcohol  
 16 consumption, duration of education, household income, and living with spouse or partner.

17

18

19 **Supplementary Table 3** Associations (hazard ratios [HRs] with 95% confidence intervals  
 20 [CIs]) between baseline self-rated health (SRH) and all-cause mortality or cancer diagnosis  
 21 at median age at the end of follow-up in the Norwegian Women and Cancer cohort.

|                                                                   | Median age | Age-adjusted <sup>a</sup> |           | Multivariable <sup>b</sup> |           |
|-------------------------------------------------------------------|------------|---------------------------|-----------|----------------------------|-----------|
|                                                                   |            | HR                        | 95% CI    | HR                         | 95% CI    |
| <b>Full cohort (N=110 104)</b>                                    | 68         |                           |           |                            |           |
| <b>Good vs. very good SRH (N=67 244)</b>                          |            | 1.42                      | 1.34-1.50 | 1.19                       | 1.12-1.26 |
| <b>Poor vs. very good SRH (N=7487)</b>                            |            | 2.66                      | 2.46-2.88 | 1.81                       | 1.66-1.97 |
| <b>Transition 1: entry to cancer diagnosis (N=110 104)</b>        | 62         |                           |           |                            |           |
| <b>Good vs. very good SRH (N=67 244)</b>                          |            | 1.12                      | 1.06-1.17 | 1.14                       | 1.08-1.20 |
| <b>Poor vs. very good SRH (N=7487)</b>                            |            | 1.40                      | 1.28-1.53 | 1.44                       | 1.32-1.58 |
| <b>Transition 2: entry to death, cancer-free women (N=94 685)</b> | 68         |                           |           |                            |           |
| <b>Good vs. very good SRH (N=9742)</b>                            |            | 2.00                      | 1.81-2.22 | 1.59                       | 1.44-1.77 |
| <b>Poor vs. very good SRH</b>                                     |            | 5.68                      | 4.99-6.47 | 3.34                       | 2.91-3.84 |
| <b>Transition 3: cancer diagnosis to death (N=15 412)</b>         | 68         |                           |           |                            |           |
| <b>Good vs. very good SRH (N=9742)</b>                            |            | 1.06                      | 0.97-1.16 | 1.01                       | 0.93-1.11 |
| <b>Poor vs. very good SRH (N=1268)</b>                            |            | 1.34                      | 1.17-1.53 | 1.20                       | 1.04-1.39 |

22 a) Age adjustment was performed using age as the underlying timescale

23 b) In the multivariable models, we adjusted for age (timescale), physical activity level, smoking habits, education length,  
 24 household income, living with spouse or partner, BMI, and alcohol consumption.

25
